# Supplementary material for: Dibutyl Itaconate and Lauryl Methacrylate Copolymers by Emulsion Polymerization for Development of Sustainable Pressure-Sensitive Adhesives
Source: MDPI journal article supplement (doi:10.3390/polym14030632), 2022-02-07
Supplement: s1 [file s1]

# Dibutyl Itaconate and Lauryl Methacrylate Copolymers by Emulsion Polymerization for Development of Sustainable Pressure-Sensitive Adhesives

Carlos Rafael Casas-Soto <sup>1</sup>, Alain Salvador Conejo-Dávila <sup>1</sup>, Velia Osuna <sup>2</sup>, David Chávez-Flores <sup>3</sup>, José Carlos Espinoza-Hicks <sup>3</sup>, Sergio Gabriel Flores-Gallardo <sup>1</sup> and Alejandro Vega-Rios <sup>1,\*</sup>

<sup>1</sup> Department of Engineering and Materials Chemistry, Centro de Investigación en Materiales Avanzados, SC, Miguel de Cervantes No. 120, Chihuahua C.P. 31136, Mexico; carlos.casas@cimav.edu.mx (C.R.C.-S.); alain.conejo@cimav.edu.mx (A.S.C.-D.); sergio.flores@cimav.edu.mx (S.G.F.-G.)

<sup>2</sup> Consejo Nacional de Ciencia y Tecnología (CONACyT)-Centro de Investigación en Materiales Avanzados, SC (CIMAV), Miguel de Cervantes No. 120, Chihuahua C.P. 31136, Mexico; velia.osuna@cimav.edu.mx

<sup>3</sup> Facultad de Ciencias en Química, Universidad Autónoma de Chihuahua, Chihuahua C.P. 31125, Mexico; dchavezf@uach.mx (D.C.-F.); jhicks@uach.mx (J.C.E.-H.)

\* Correspondence: alejandro.vega@cimav.edu.mx; Tel.: +52-01-614-439-4831

**Citation:** Casas-Soto, C.R.; Conejo-Dávila, A.S.; Osuna, V.; Chávez-Flores, D.; Espinoza-Hicks, J.C.; Flores-Gallardo, S.G.; Vega-Rios, A. Dibutyl Itaconate and Lauryl Methacrylate Copolymers by Emulsion Polymerization for Development of Sustainable Pressure-Sensitive Adhesives. *Polymers* **2022**, *14*, 632. <https://doi.org/10.3390/xxxxx>

Academic Editors: Charles Frihart, Christopher G. Hunt and Ahmed I. A. Abd El-Mageed

Received: 11 November 2021

Accepted: 3 February 2022

Published: date

**Publisher's Note:** MDPI stays neutral with regard to jurisdictional claims in published maps and institutional affiliations.

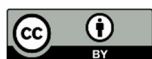

**Copyright:** © 2022 by the authors. Licensee MDPI, Basel, Switzerland. This article is an open access article distributed under the terms and conditions of the Creative Commons Attribution (CC BY) license (<http://creativecommons.org/licenses/by/4.0/>).

## List of Figures

|                                                                                                                                                                |   |
|----------------------------------------------------------------------------------------------------------------------------------------------------------------|---|
| Figure S1. Mechanisms of particle nucleation formation.....                                                                                                    | 2 |
| Figure S2. <sup>1</sup> H-NMR spectrum of PSA-1000 [poly(DBI-stat-IA) (99 wt. % DBI : 1 wt.% IA)] in CDCl <sub>3</sub> .....                                   | 3 |
| Figure S3. <sup>1</sup> H-NMR spectrum of PSA-5000 [poly(LMA-stat-IA) (99 wt. % LMA: 1 wt.% IA)] in CDCl <sub>3</sub> .....                                    | 3 |
| Figure S4. <sup>1</sup> H-NMR spectrum of PSA 3000 [poly(DBI-stat-LMA-stat-IA) (49 wt. % DBI : 50 wt. % LMA: 1 wt.% IA)] in CDCl <sub>3</sub> .....            | 4 |
| Figure S5. <sup>1</sup> H- <sup>1</sup> H COSY of PSA-3000 [poly(DBI-stat-LMA-stat-IA) (49 wt. % DBI : 50 wt. % LMA: 1 wt.% IA)] in CDCl <sub>3</sub> . ....   | 4 |
| Figure S6. <sup>1</sup> H- <sup>1</sup> H COSY of PSA-2000 [poly(DBI-stat-LMA-stat-IA) (74 wt. % DBI : 25 wt. % LMA: 1 wt.% IA)] in CDCl <sub>3</sub> . ....   | 5 |
| Figure S7. <sup>1</sup> H- <sup>1</sup> H COSY of PSA-4000 [poly(DBI-stat-LMA-stat-IA) (24 wt. % DBI : 75 wt. % LMA: 1 wt.% IA)] in CDCl <sub>3</sub> . ....   | 5 |
| Figure S8. <sup>1</sup> H- <sup>13</sup> C HSQC of PSA-3000 [poly(DBI-stat-LMA-stat-IA) (49 wt. % DBI : 50 wt. % LMA: 1 wt.% IA)] in CDCl <sub>3</sub> . ....  | 6 |
| Figure S9. <sup>1</sup> H- <sup>13</sup> C HSQC of PSA-2000 [poly(DBI-stat-LMA-stat-IA) (74 wt. % DBI : 25 wt. % LMA: 1 wt.% IA)] in CDCl <sub>3</sub> . ....  | 6 |
| Figure S10. <sup>1</sup> H- <sup>13</sup> C HSQC of PSA-4000 [poly(DBI-stat-LMA-stat-IA) (24 wt. % DBI : 75 wt. % LMA: 1 wt.% IA)] in CDCl <sub>3</sub> . .... | 7 |
| Figure S11. <sup>13</sup> C-NMR spectrum of PSA 3000 [poly(DBI-stat-LMA-stat-IA) (49 wt. % DBI : 50 wt. % LMA: 1 wt.% IA)] in CDCl <sub>3</sub> . ....         | 7 |
| Figure S12. DEPT-135 of PSA-3000 sample.....                                                                                                                   | 8 |
| Figure S13. Analysis of PSA-3000 at different relaxation times (D1)...                                                                                         | 8 |

|                                                                                                                        |    |
|------------------------------------------------------------------------------------------------------------------------|----|
| Figure S14. Area correlation of the band $2923\text{ cm}^{-1}$ as a function of the LMA content. ....                  | 10 |
| Figure S15. Area correlation of the band $2853\text{ cm}^{-1}$ as a function of the LMA content. ....                  | 10 |
| Figure S16. FTIR spectra of copolymers films. a) PSA-5000; b) PSA-4000; c) PSA-3000; d) PSA-2000; e) PSA-1000. ....    | 11 |
| Figure S17. Kinetic conversion study in relation to the gel content of the PSA-4000 sample. ....                       | 11 |
| Figure S18. DSC thermograms of copolymers films. a) PSA-5000; b) PSA-4000; c) PSA-3000; d) PSA-2000; e) PSA-1000. .... | 12 |

## List of Tables

|                                                                                            |   |
|--------------------------------------------------------------------------------------------|---|
| Table S1. Area and number of protons used to calculate the composition of copolymers. .... | 9 |
|--------------------------------------------------------------------------------------------|---|

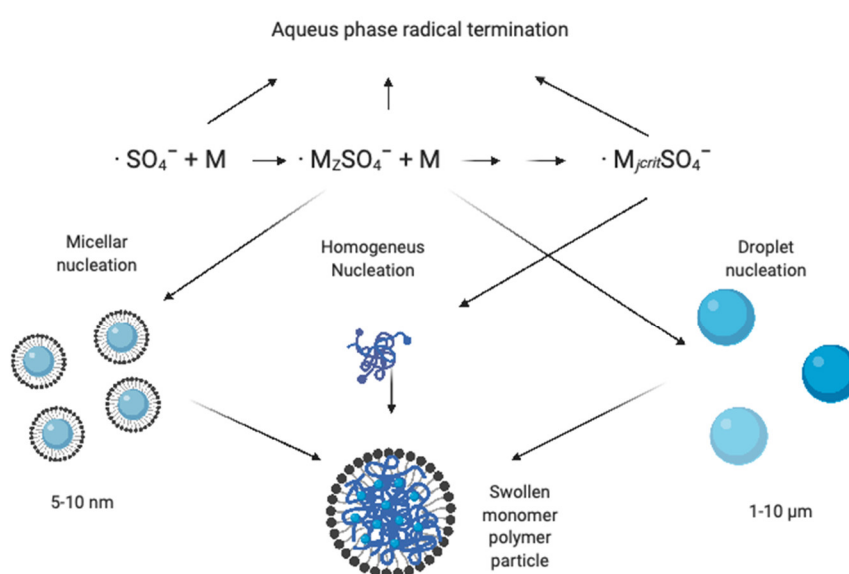

**Figure S1.** Mechanisms of particle nucleation formation.

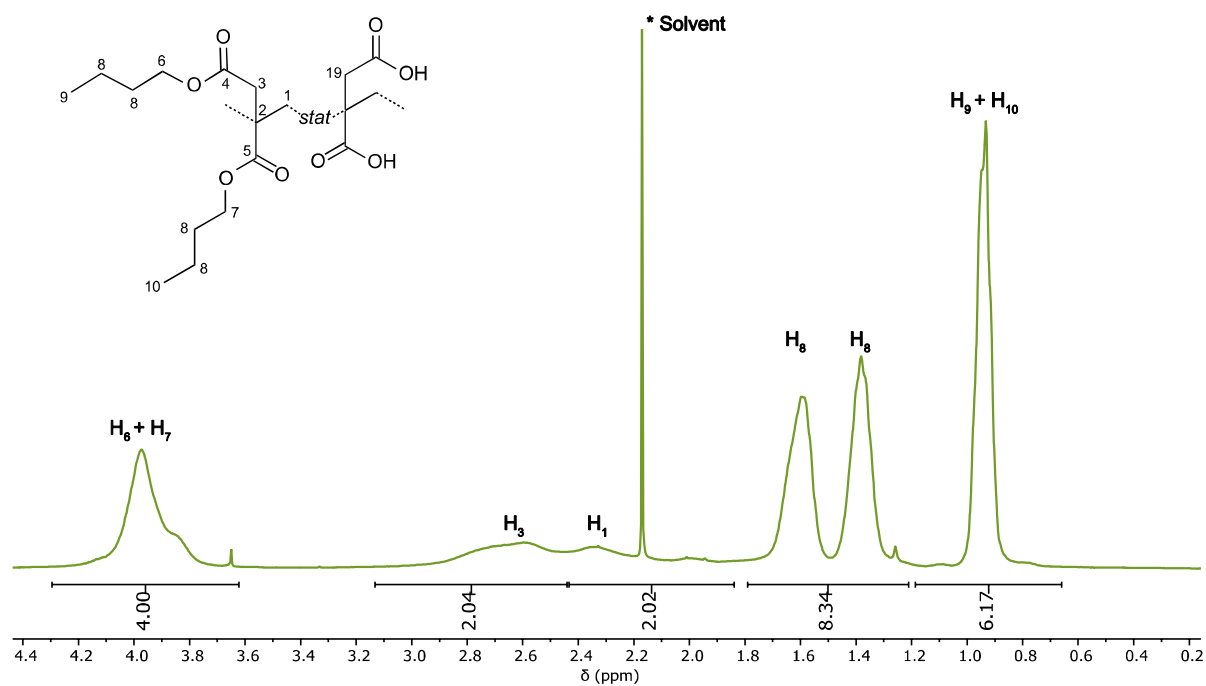

**Figure S2.**  $^1\text{H}$ -NMR spectrum of PSA-1000 [poly(DBI-stat-IA) (99 wt. % DBI : 1 wt.% IA)] in  $\text{CDCl}_3$ .

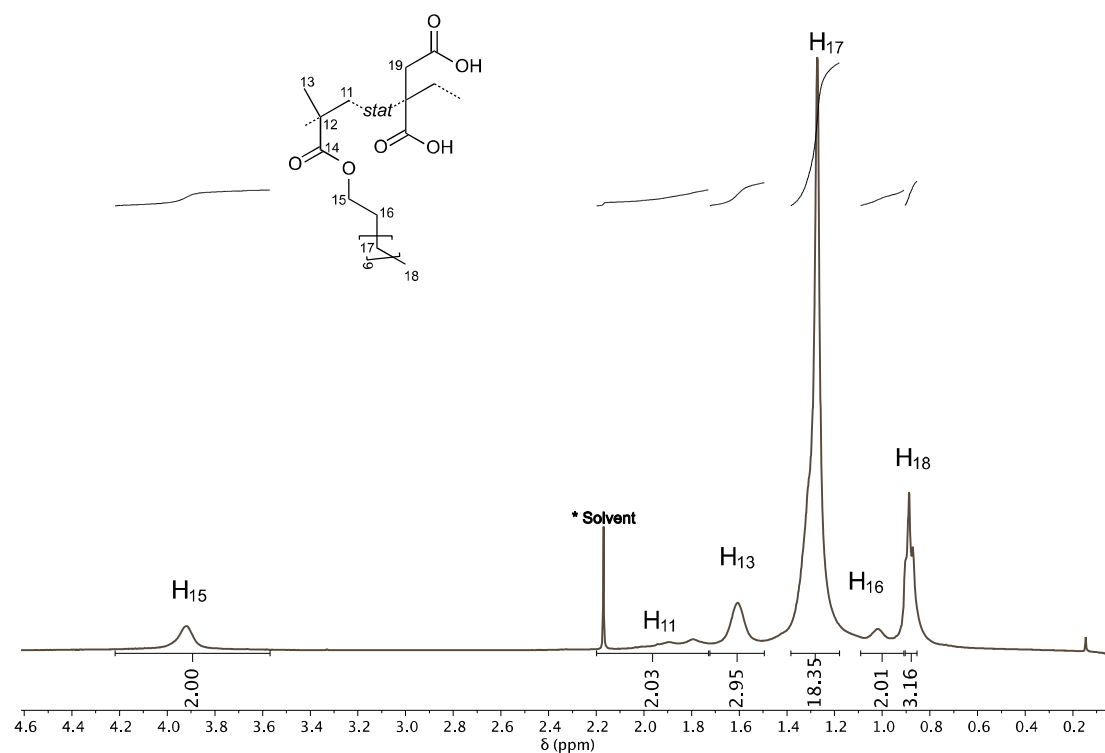

**Figure S3.**  $^1\text{H}$ -NMR spectrum of PSA-5000 [poly(LMA-stat-IA) (99 wt. % LMA: 1 wt.% IA)] in  $\text{CDCl}_3$ .

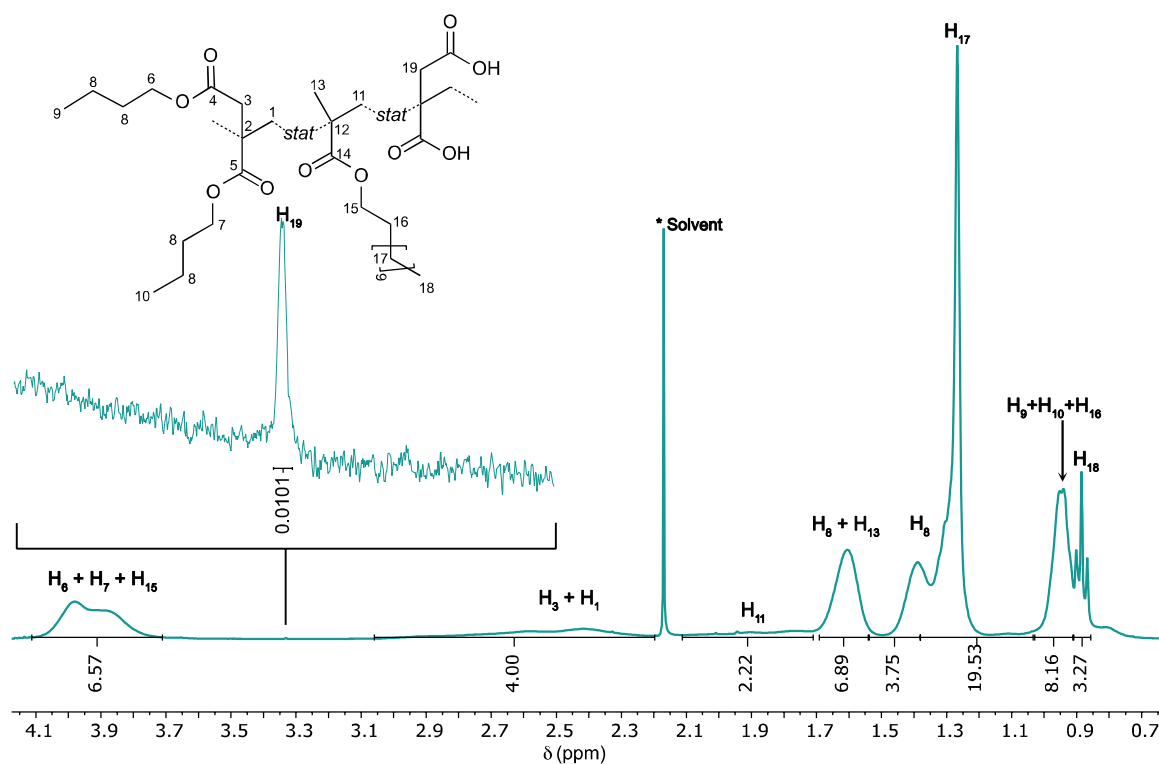

**Figure S4.**  $^1\text{H}$ -NMR spectrum of PSA 3000 [poly(DBI-stat-LMA-stat-IA) (49 wt. % DBI : 50 wt. % LMA: 1 wt.% IA)] in  $\text{CDCl}_3$ .

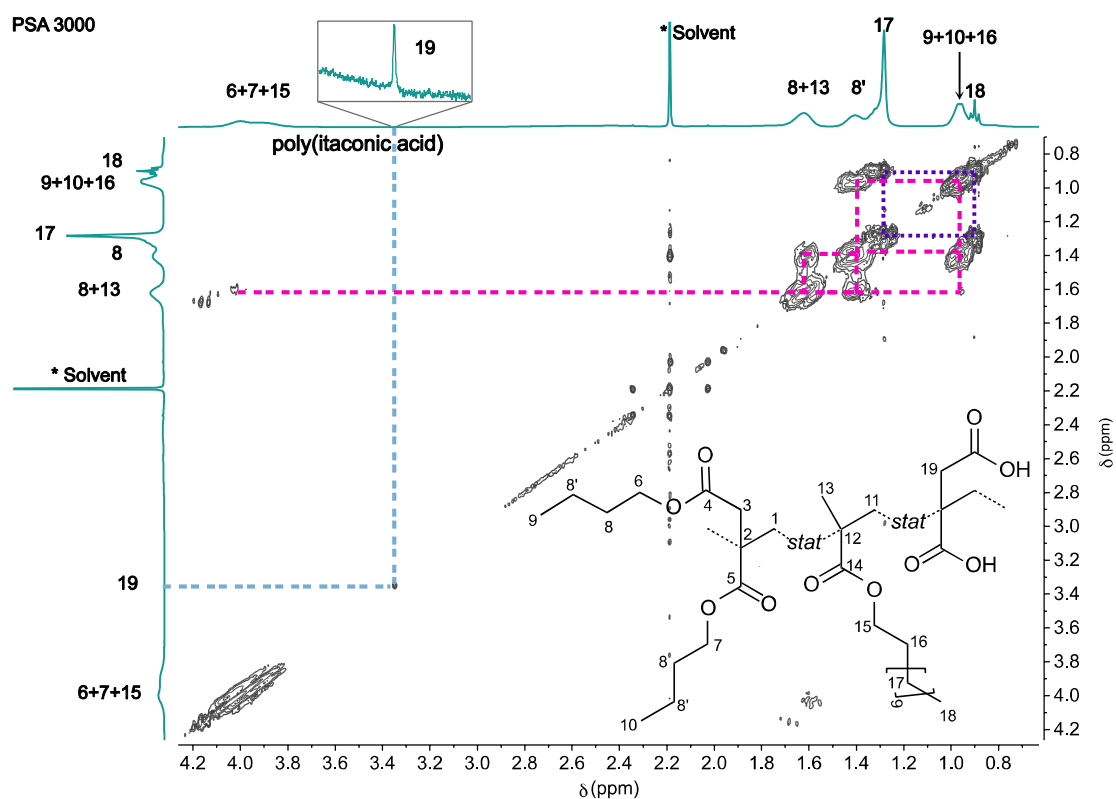

**Figure S5.**  $^1\text{H}$ - $^1\text{H}$  COSY of PSA-3000 [poly(DBI-stat-LMA-stat-IA) (49 wt. % DBI : 50 wt. % LMA: 1 wt.% IA)] in  $\text{CDCl}_3$ .

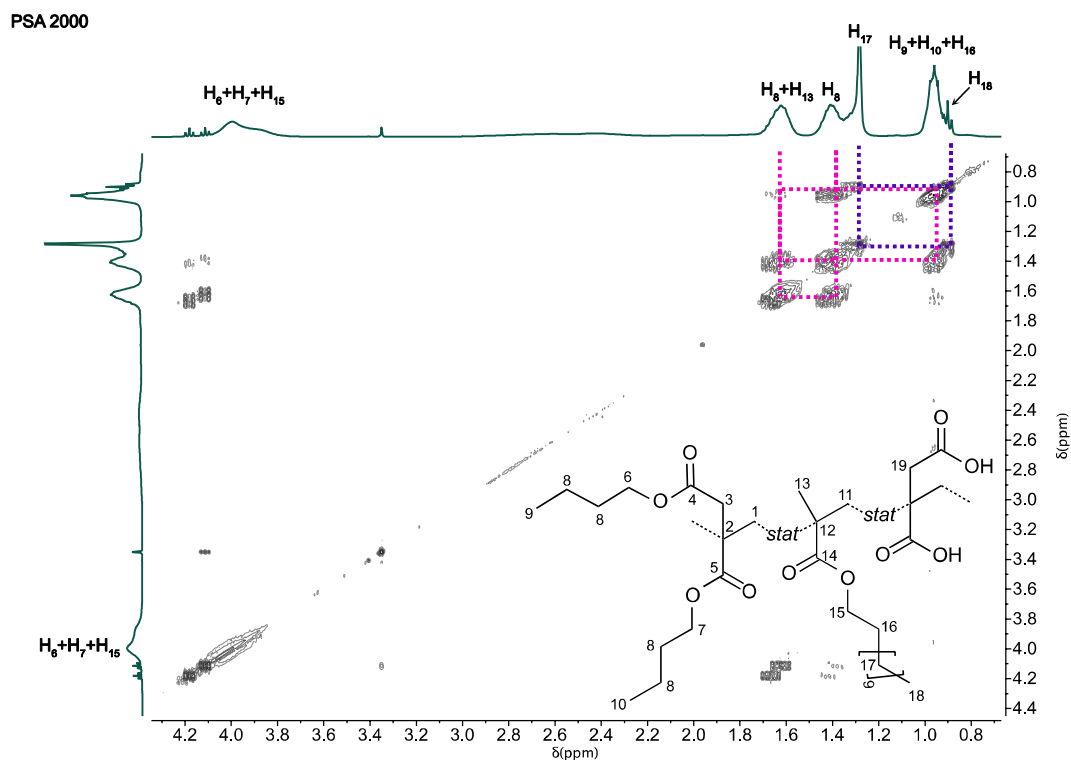

Figure S6.  $^1\text{H}$ - $^1\text{H}$  COSY of PSA-2000 [poly(DBI-*stat*-LMA-*stat*-IA) (74 wt. % DBI : 25 wt. % LMA : 1 wt.% IA)] in  $\text{CDCl}_3$ .

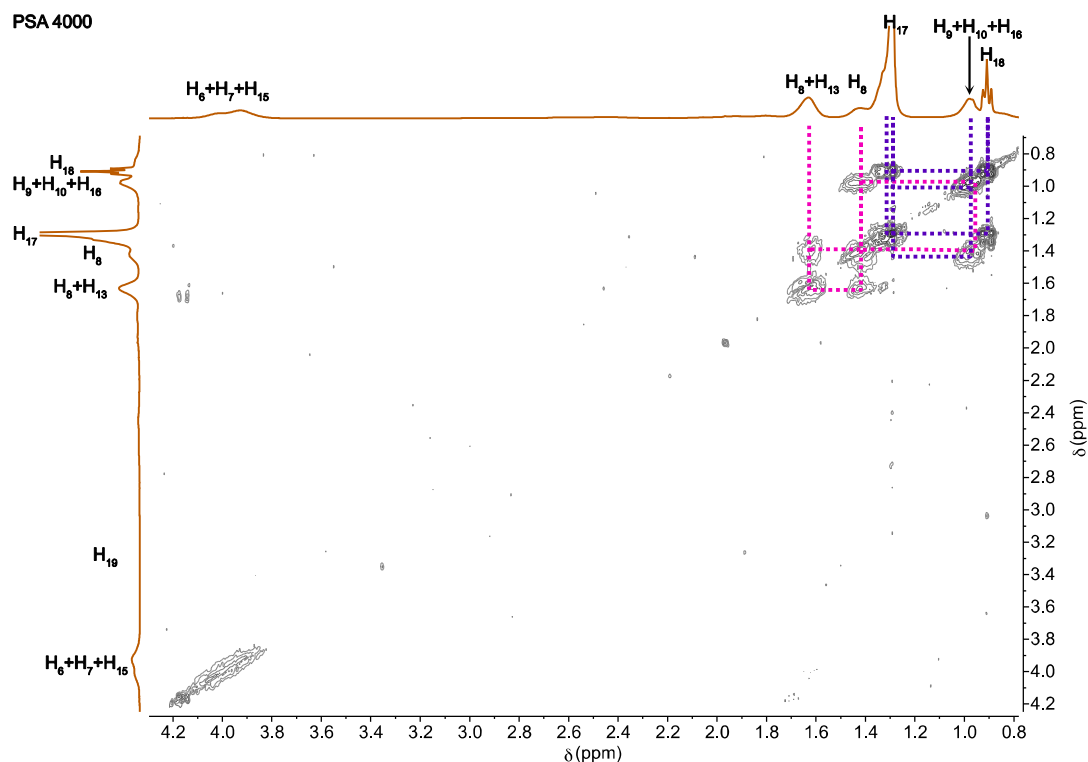

Figure S7.  $^1\text{H}$ - $^1\text{H}$  COSY of PSA-4000 [poly(DBI-*stat*-LMA-*stat*-IA) (24 wt. % DBI : 75 wt. % LMA : 1 wt.% IA)] in  $\text{CDCl}_3$ .

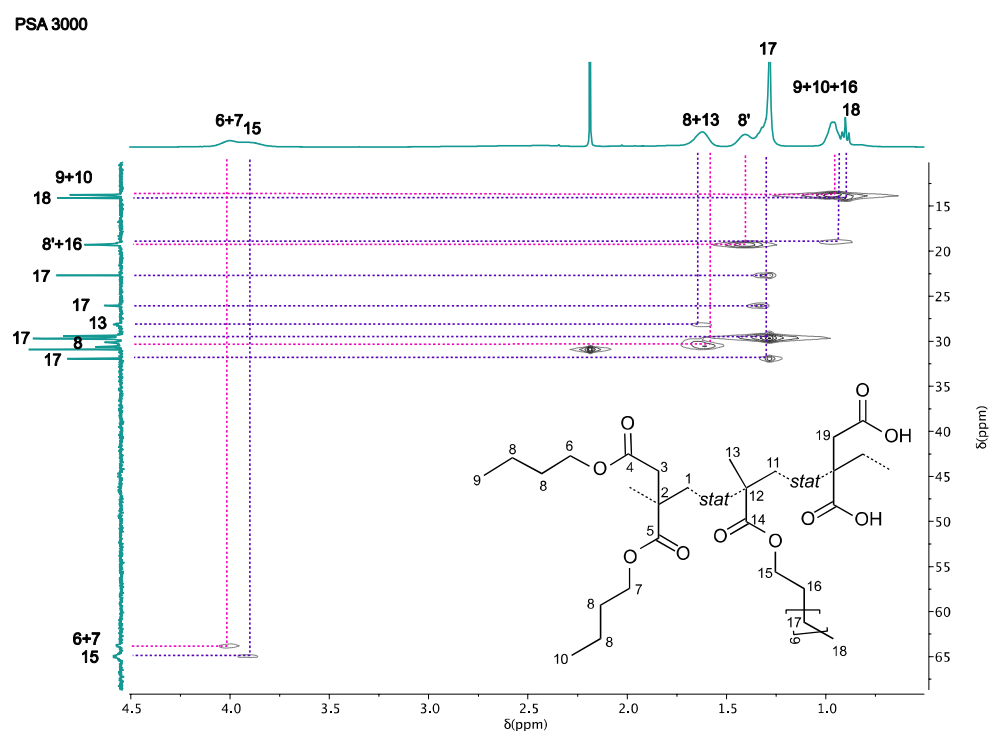

Figure S8.  $^1\text{H}$ - $^{13}\text{C}$  HSQC of PSA-3000 [poly(DBI-stat-LMA-stat-IA) (49 wt. % DBI : 50 wt. % LMA: 1 wt.% IA)] in  $\text{CDCl}_3$ .

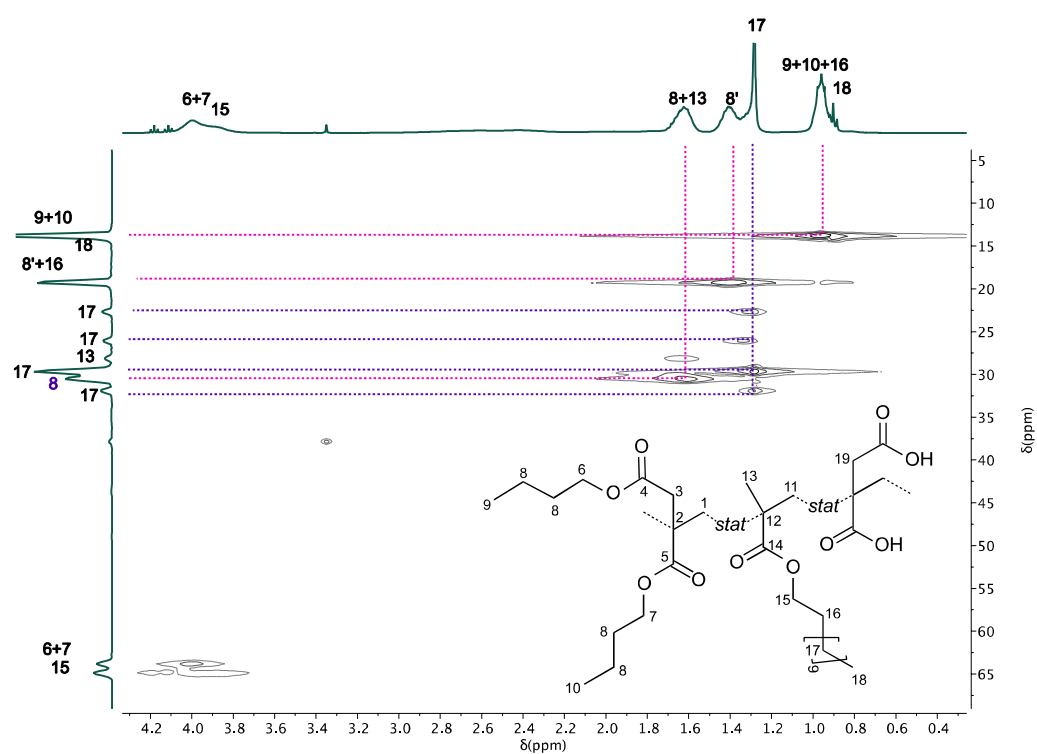

Figure S9.  $^1\text{H}$ - $^{13}\text{C}$  HSQC of PSA-2000 [poly(DBI-stat-LMA-stat-IA) (74 wt. % DBI : 25 wt. % LMA: 1 wt.% IA)] in  $\text{CDCl}_3$ .

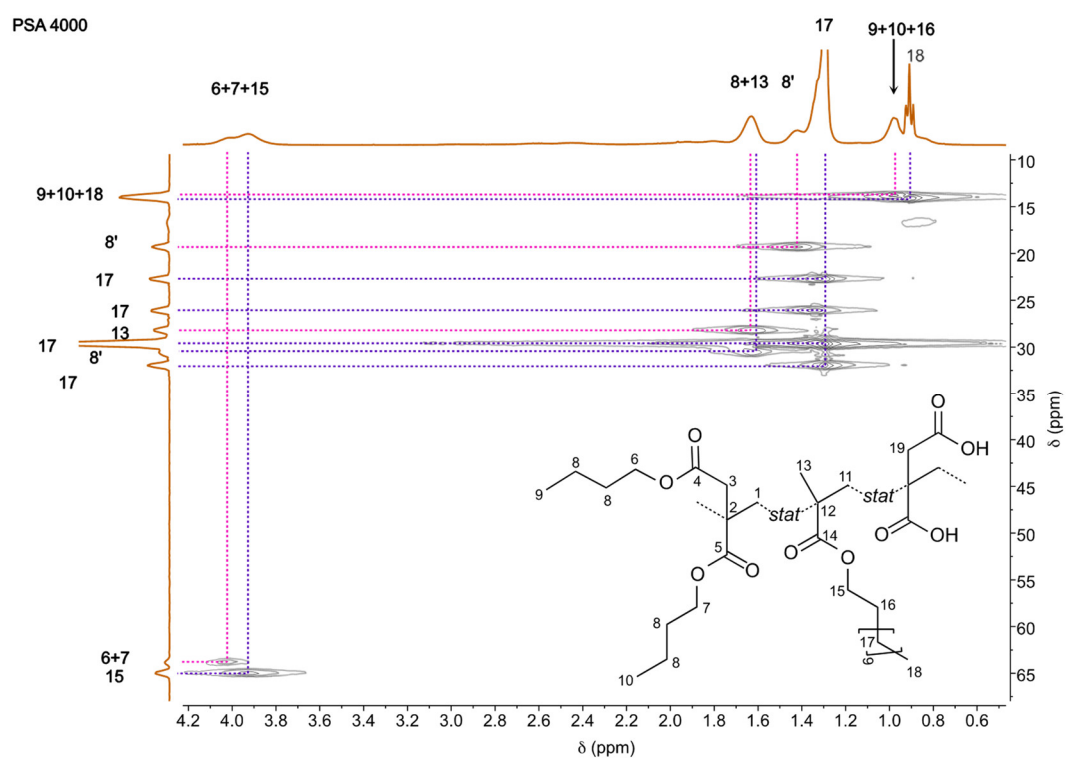

**Figure S10.**  $^1\text{H}$ - $^{13}\text{C}$  HSQC of PSA-4000 [poly(DBI-*stat*-LMA-*stat*-IA) (24 wt. % DBI : 75 wt. % LMA: 1 wt.% IA)] in  $\text{CDCl}_3$ .

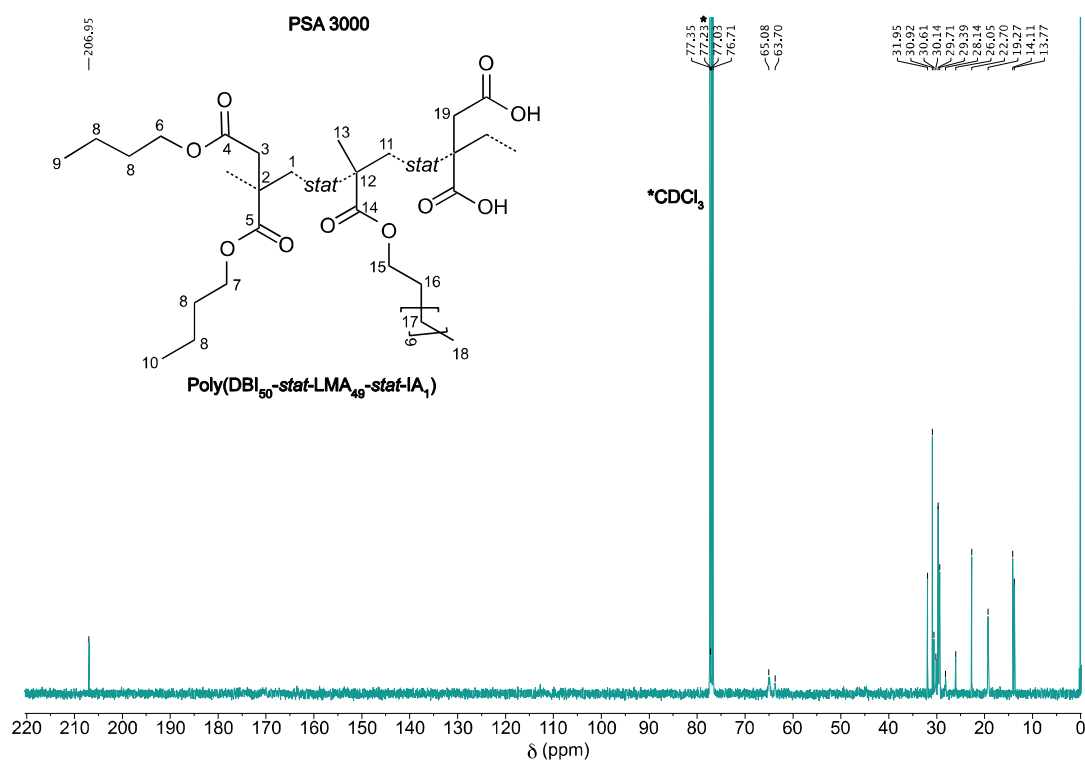

**Figure S11.**  $^{13}\text{C}$ -NMR spectrum of PSA 3000 [poly(DBI-*stat*-LMA-*stat*-IA) (49 wt. % DBI : 50 wt. % LMA: 1 wt.% IA)] in  $\text{CDCl}_3$ .

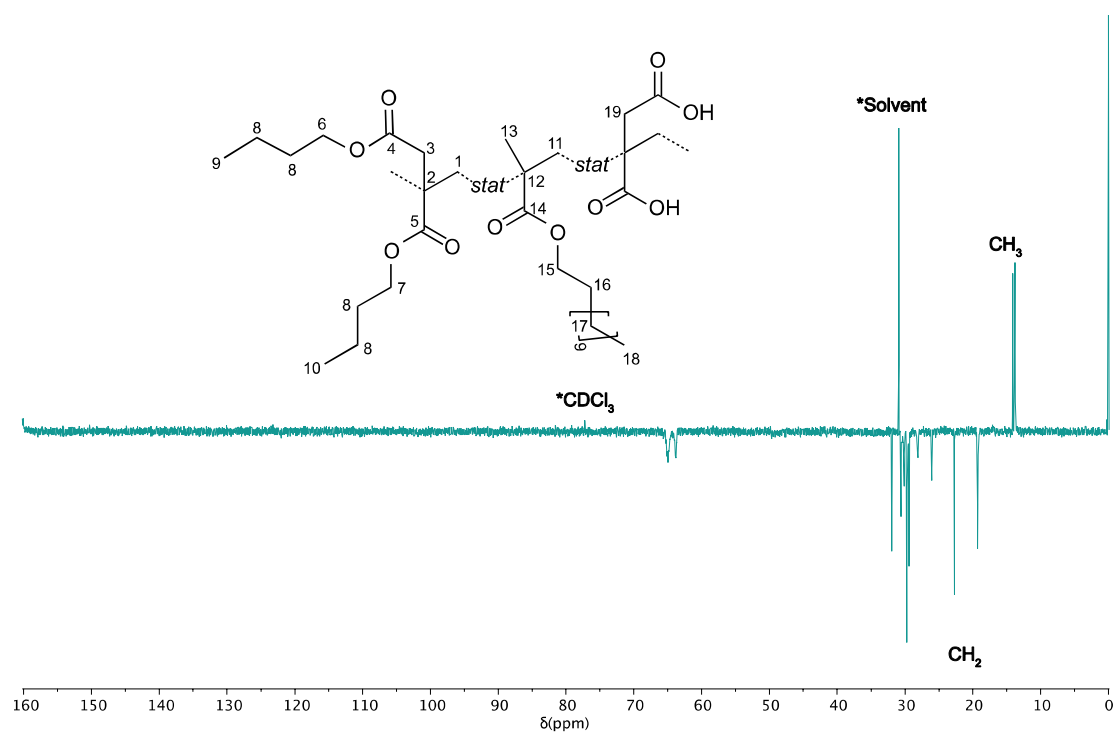

Figure S12. DEPT-135 of PSA-3000 sample.

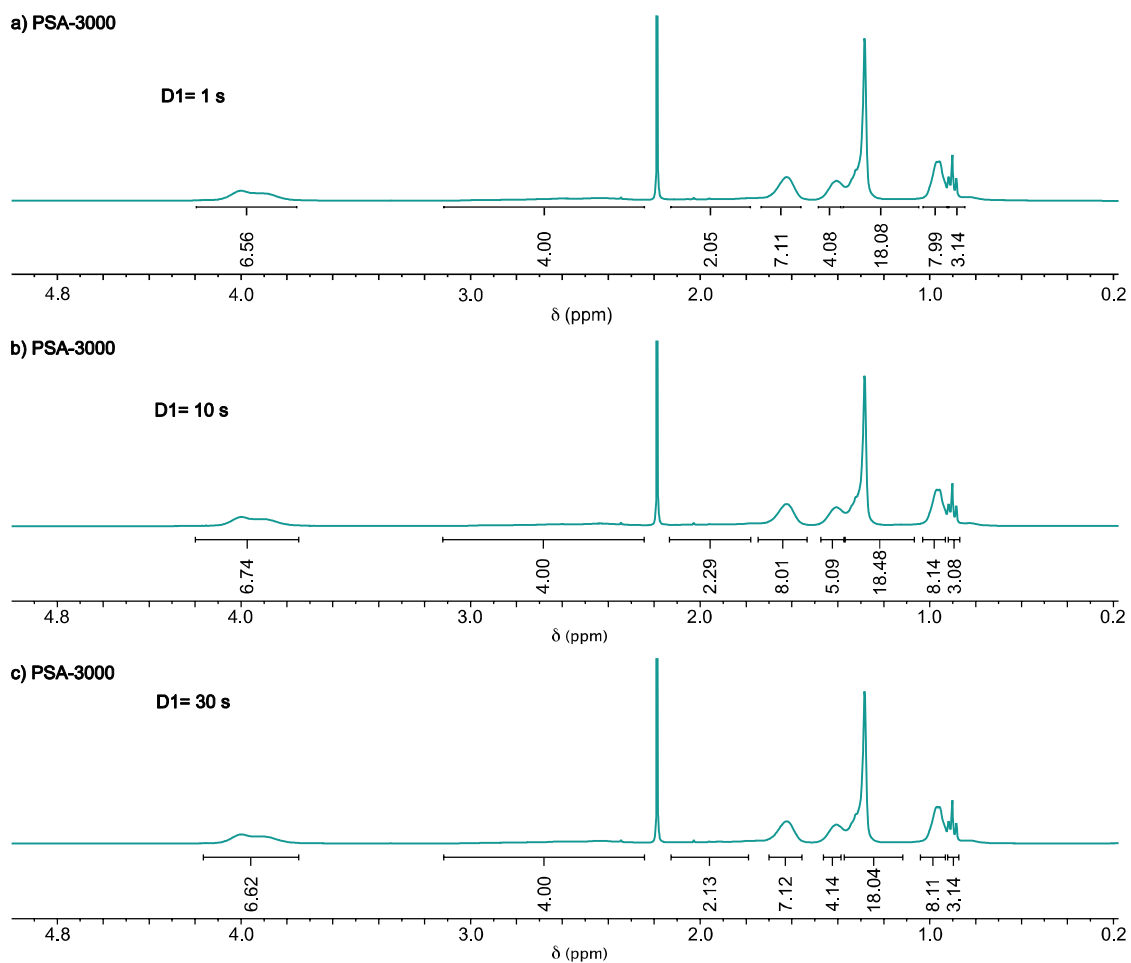Figure S13. Analysis of PSA-3000 at different relaxation times ( $D1$ ).



**Table S1.** Area and number of protons used to calculate the composition of copolymers.

| Sample  | IA              |      | DBI     |         | LMA             |      |
|---------|-----------------|------|---------|---------|-----------------|------|
|         | A <sub>19</sub> | P 19 | A (1+3) | P (1+3) | A <sub>18</sub> | P 18 |
| DBI     | 0.0070          | 2    | 4.0540  | 4       | 0               | 0    |
| LMMA    | 0.0145          | 2    | 0       | 0       | 3.1556          | 3    |
| PDBI 49 | 0.0050          | 2    | 4.0010  | 4       | 3.2662          | 3    |
| PDBI 74 | 0.0076          | 2    | 2.7045  | 4       | 0.9360          | 3    |
| PDBI 24 | 0.0064          | 2    | 1.0850  | 4       | 2.6337          | 3    |

Binary copolymers

$$\% IA = \frac{\frac{A_{19}}{P_{19}}}{\frac{A_{19}}{P_{19}} + \frac{A_{1+3}}{P(1+3)}} \times 100$$

$$\% DBI = \frac{\frac{A_{1+3}}{P(1+3)}}{\frac{A_{19}}{P_{19}} + \frac{A_{1+3}}{P(1+3)}} \times 100$$

$$\% LMMA = \frac{\frac{A_{18}}{P(18)}}{\frac{A_{19}}{P_{19}} + \frac{A_{18}}{P(18)}} \times 100$$

Ternary copolymers

$$\% IA = \frac{\frac{A_{19}}{P_{19}}}{\frac{A_{19}}{P_{19}} + \frac{A_{1+3}}{P(1+3)} + \frac{A_{18}}{P(18)}} \times 100$$

$$\% DBI = \frac{\frac{A_{1+3}}{P(1+3)}}{\frac{A_{19}}{P_{19}} + \frac{A_{1+3}}{P(1+3)} + \frac{A_{18}}{P(18)}} \times 100$$

$$\% LMMA = \frac{\frac{A_{18}}{P(18)}}{\frac{A_{19}}{P_{19}} + \frac{A_{18}}{P(18)} + \frac{A_{1+3}}{P(1+3)}} \times 100$$

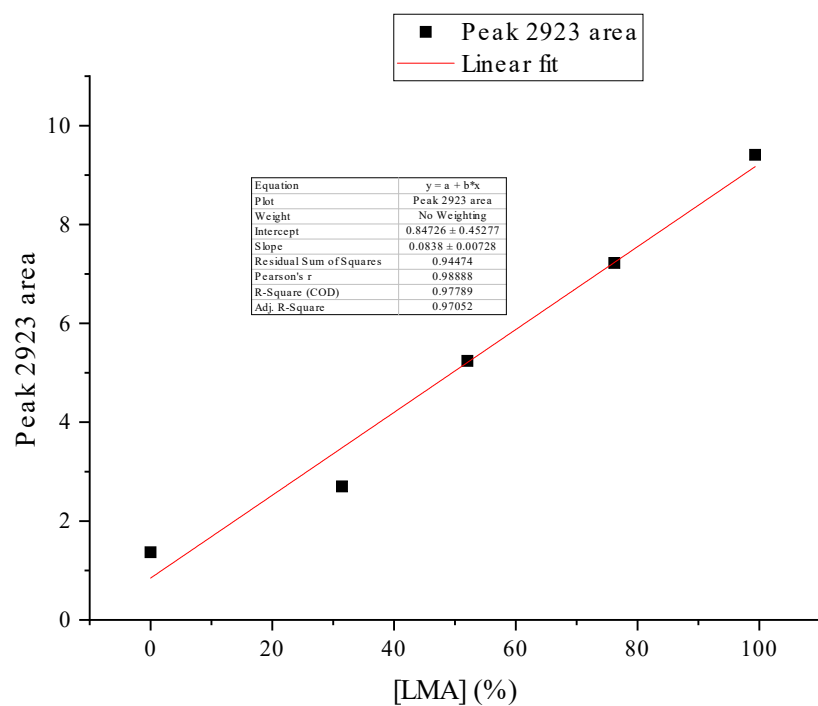

Figure S14. Area correlation of the band 2923  $\text{cm}^{-1}$  as a function of the LMA content.

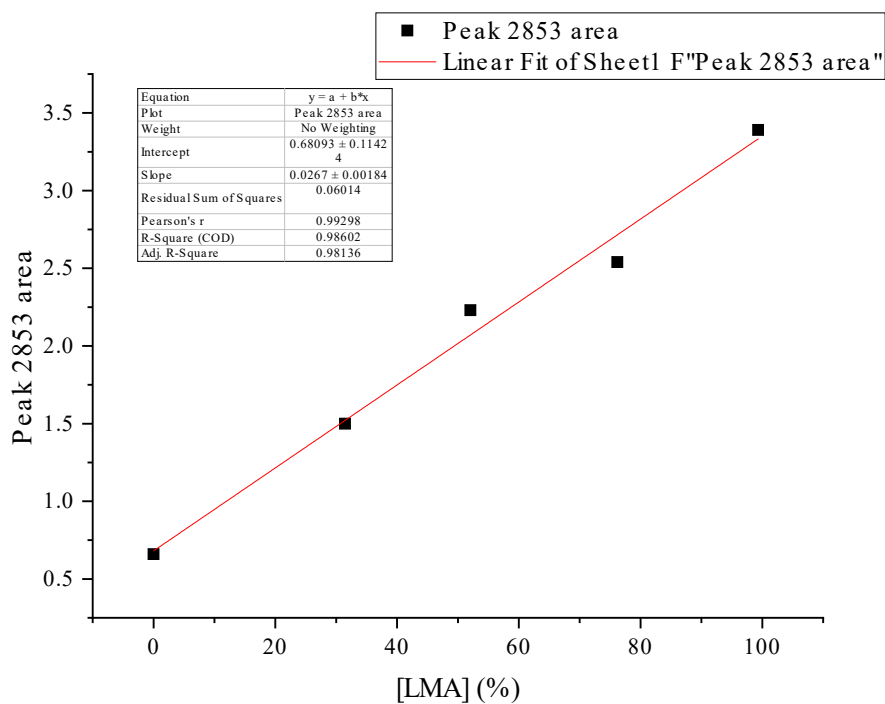

Figure S15. Area correlation of the band 2853  $\text{cm}^{-1}$  as a function of the LMA content.

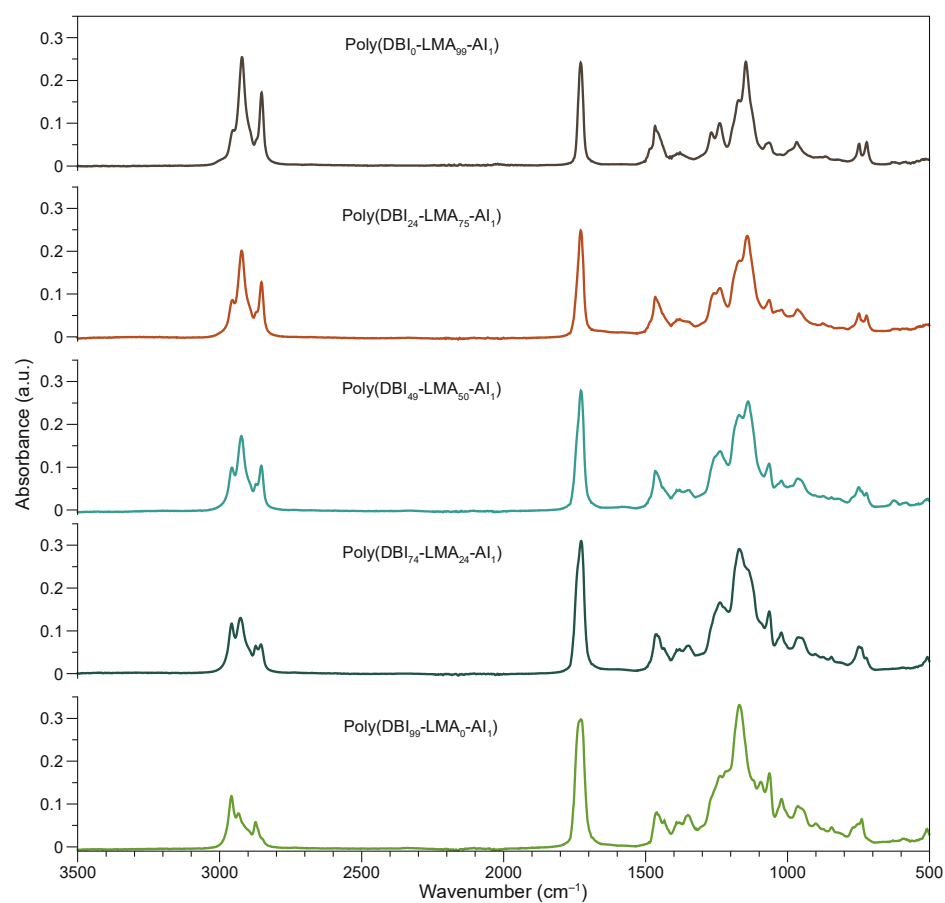

**Figure S16.** FTIR spectra of copolymers films. a) PSA-5000; b) PSA-4000; c) PSA-3000; d) PSA-2000; e) PSA-1000.

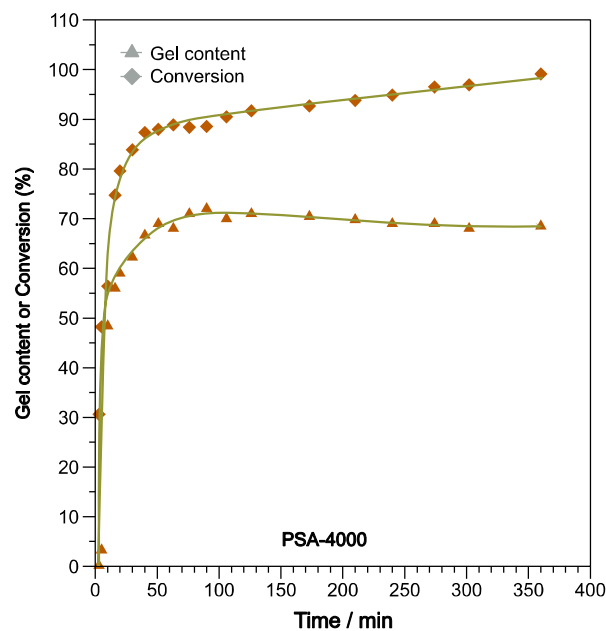

**Figure S17.** Kinetic conversion study in relation to the gel content of the PSA-4000 sample.

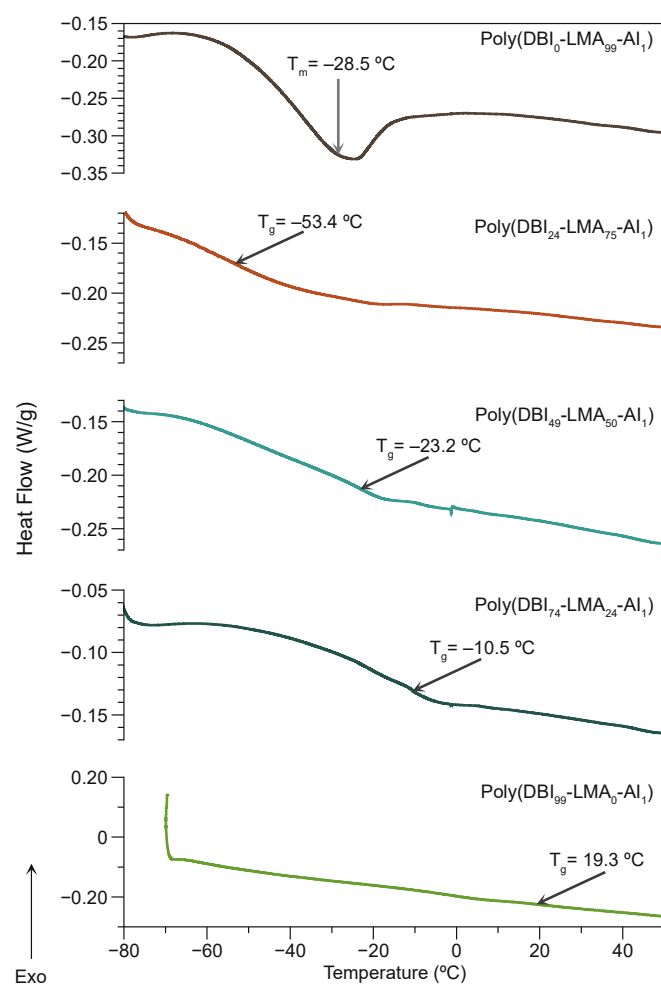

**Figure S18.** DSC thermograms of copolymers films. a) PSA-5000; b) PSA-4000; c) PSA-3000; d) PSA-2000; e) PSA-1000.
